# Supplementary material
Source: PubMed Central journal article supplement (PMC2259046)
Supplement: plntphys_pp.107.113555_4.pdf [file plntphys_pp.107.113555_4.pdf]

## Supplemental figures

**Figure S1.** Comparison of *PEX11b* expression at different time periods after far-red light treatment in wild-type and *phyA* mutant plants. The values used for plotting the histogram were obtained from Hudson and Quail (2003). The numbers along the X-axis indicate the time of illumination in hours.

**Figure S2.** RT-PCR analysis of *PEX11b* and *UBQ10* in 3d dark-grown *phyA* signaling pathway mutants after exposure to far-red light. Plants were exposed to 2h of continuous far-red light at  $2 \mu\text{mol m}^{-2} \text{s}^{-1}$ .

**Figure S3.** Analysis of the *PEX11b* promoter region. Predicted LREs are indicated.
