# Supplementary material
Source: PubMed Central journal article supplement (PMC2259046)

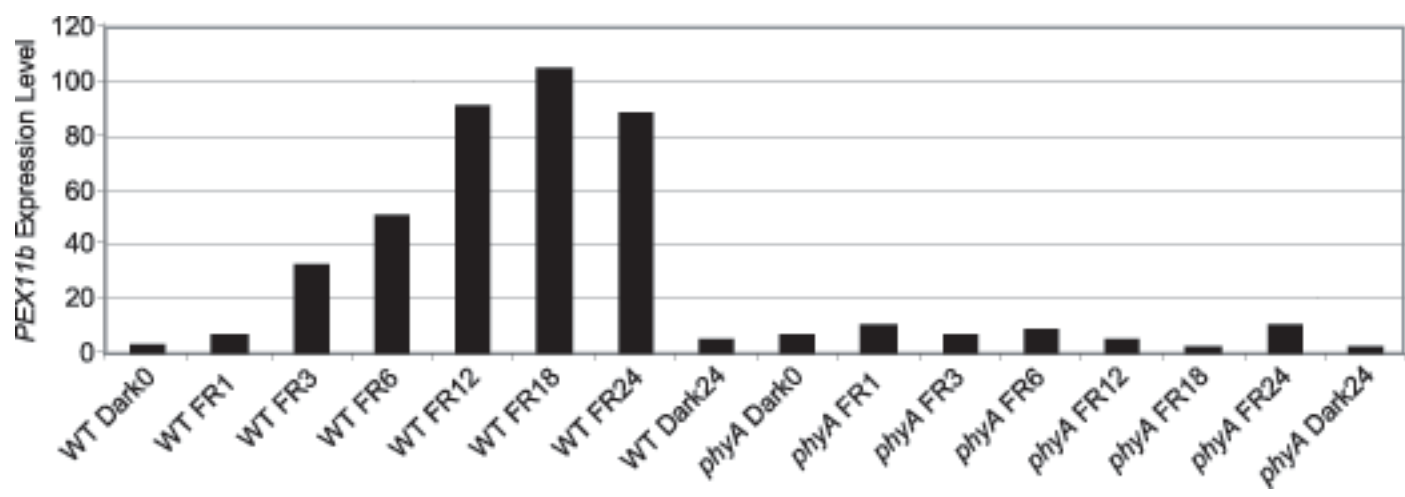

Supplement: plntphys_pp.107.113555_1.pdf [file plntphys_pp.107.113555_1.pdf]

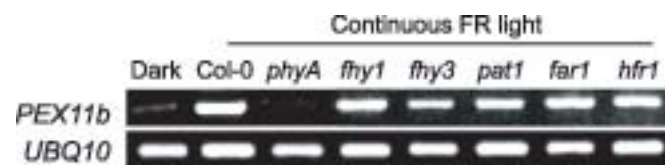

Supplement: plntphys_pp.107.113555_2.pdf [file plntphys_pp.107.113555_2.pdf]

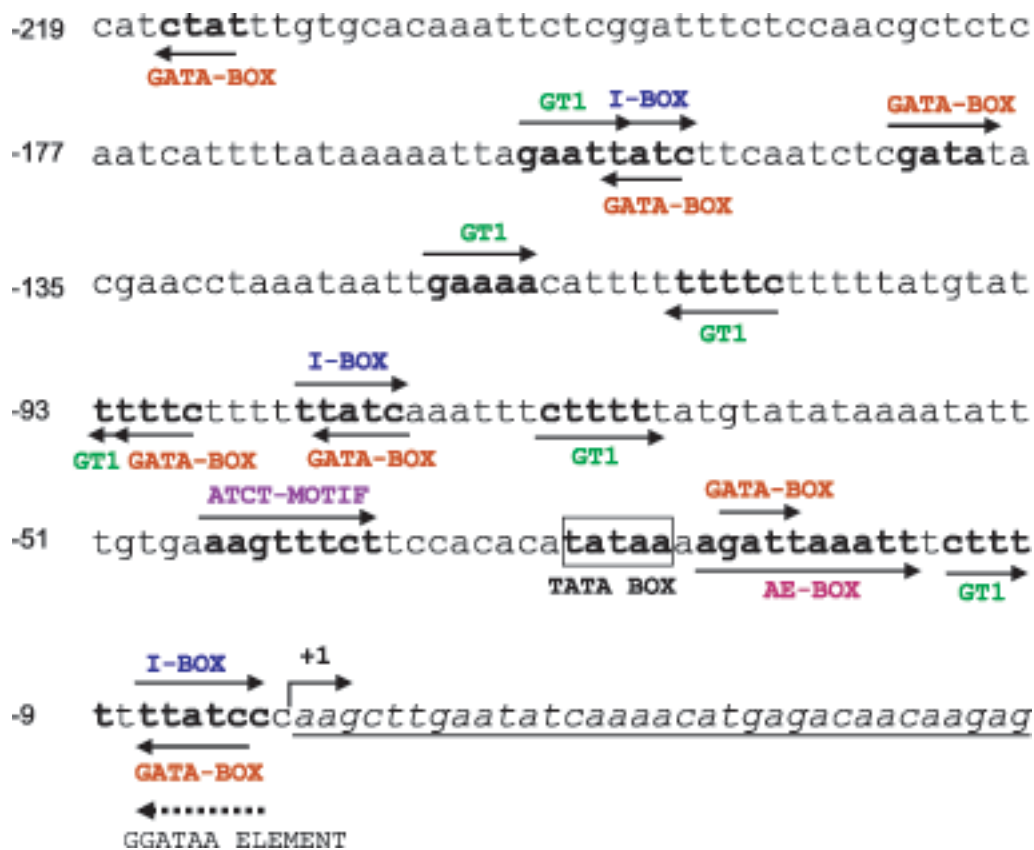

Supplement: plntphys_pp.107.113555_3.pdf [file plntphys_pp.107.113555_3.pdf]
